# Supplementary material for: Organophosphate Triesters and Their Transformation Products in Sediments of Mangrove Wetlands in the Beibu Gulf, South China Sea
Source: MDPI journal article supplement (doi:10.3390/molecules29030736), 2024-02-05
Supplement: s1 [file s1]

# Supplementary Information

## Organophosphate Triesters and Their Transformation Products in Sediments of Mangrove Wetlands in the Beibu Gulf, South China Sea

Li Zhang <sup>1,2</sup>, Yongze Xing <sup>1,2,\*</sup>, Peng Zhang <sup>3</sup>, Xin Luo <sup>4</sup> and Zengyuan Niu <sup>4</sup>

<sup>1</sup> Guangxi Key Laboratory of Beibu Gulf Marine Resources, Environment and Sustainable Development, Fourth Institute of Oceanography, Ministry of Natural Resources, Beihai 536000, China; zhangli@4io.org.cn

<sup>2</sup> Key Laboratory of Tropical Marine Ecosystem and Bioresource, Fourth Institute of Oceanography, Ministry of Natural Resources, Beihai 536000, China

<sup>3</sup> College of Chemistry and Environmental Science, Guangdong Ocean University, Zhanjiang 524088, China; zhangpeng@gdou.edu.cn

<sup>4</sup> Technology Center of Qingdao Customs District, Qingdao 266109, China; rossi612@hotmail.com (X.L.); zyniuqd@163.com (Z.N.)

\* Correspondence: Correspondence: haiyangsisuo2020@163.com

### **Text S1 Sample pretreatment**

Prior to chemical analysis, sediment samples were freeze-dried by CHRIST Alpha 1-4 LSCbasic (Osterode, Germany), then grounded using Retsch MM400 (Haan, Germany), and homogenized by sieving through a stainless steel 80-mesh sieve.

For all OP triesters and two hydroxylated degradation products (BBOEHEP and 3-OH-BBOEP), 2 g of the homogenized sediment was added in a 30 mL glass tube, after which 20 ng isotopically labeled standards of TNBP-d27, TPHP-d15, TCIPP-d18 and BBOEHEP-d4 were added as internal standards (IS), and then extracted by an ultrasonic generator (40 KHz, KQ-500DE, Kun Shan, China) with 10 mL of acetonitrile at room temperature for 15 min. Then the extract was centrifuged for 15 min at 3500 rpm at 4 °C to collect the supernatant. Above process repeated twice. The extracts were combined and reduced to 1–2 mL under a nitrogen stream at room temperature. Forty ml of water was added and the extracts were loaded onto a pre-conditioned (5 mL methanol) and pre-equilibrated (5 mL ultrapure water) ENVI-C18 column (6 mL, 500 mg; SUPELCO), with a flow rate of 5–10 mL/min. After loading, the sorbent was washed with 5 mL of ultrapure water and dried under vacuum for 30 min. Following that, 9 mL acetonitrile (3 mL each time) was used to elute the targets retained on the cartridge, and then the eluent was condensed to near dryness under a gentle nitrogen flow at room temperature. Finally, the sample was reconstituted in 200 µL methanol and filtered by a 0.22 µm PTFE membrane before analysis.

For OP diesters, 2 g of the homogenized sediment was added in a 30 mL glass tube, after which 50 ng of DPHP-d10 and BDCIPP-d10 were spiked as IS, and then extracted by UAE with 10 mL of methanol at ambient temperature for 15 min. Then the extract was centrifuged for 10 min at 3500 rpm at 4 °C to collect the supernatant. Above process repeated twice. The extracts were combined and reduced to 1–2 mL under a nitrogen stream at room temperature. Forty mL of water was added and the extract was purified by SPE on Oasis HLB cartridges (6 mL, 500 mg; Waters) according to the OP triesters extraction protocol, except that the elute solution used methanol as instead. The eluent was then evaporated to near dryness. Finally the sample was reconstituted in 200 µL methanol and filtered by a 0.22 µm PTFE membrane before analysis.

## Text S2 Instrumental analysis

Analysis was performed with an Agilent 1290 II LC system coupled to a 6470 MS (Agilent Technologies, Mississauga, Canada). Chromatographic separation of targets was performed in an Agilent ZORBAX C18 column (4.6 mm × 100 mm, 1.8 μm). The injection volume was 5 μL, and the column temperature was 40 °C. Twelve OP triesters and their two hydroxylated degradation products were analyzed in the ESI<sup>+</sup> mode, using 5 mmol/L ammonium acetate (containing 0.1% formic acid (FA)) (A)-methanol (B) as mobile phase. OP diesters were analyzed in the ESI<sup>-</sup> mode, using water (containing 0.1% FA) (A)-methanol (B) as mobile phase. The LC gradient elution program under ESI<sup>+</sup> condition was as follows: 0–7 min, 60–80% B, 7–16 min, 97% B, 20 min, 97% B, 20.1 min, 60%, 20.1–24 min, 60% B. The LC elution gradient program under ESI<sup>+</sup> condition was as follows: 0–7 min, 50–95% B, 7–10 min, 95% B, 10.1 min, 50% B, 10.10–15 min, 50% B. The total flow rate was 0.3 mL/min.

For the triple-quadrupole MS, the operational conditions were as follows: gas temperature 250 °C; gas flow 9 L/min; sheath gas temperature 350 °C; and sheath gas flow 11 L/min. Capillary in positive and negative ionization mode was 4 kV and 3.5 kV, respectively, while nozzle voltage was 500 V in both ionization modes. Chromatograms were recorded using multiple reactions monitoring (MRM) mode. Nitrogen was applied as desolvation and collision gas.

**Table S1.** Results of Pearson correlation analysis between the OPE concentrations and the TOC contents.

| Sampling site | OP triesters |                | OP transformation products |                |
|---------------|--------------|----------------|----------------------------|----------------|
|               | P            | r <sup>2</sup> | P                          | r <sup>2</sup> |
| MWS           | 1.000 *      | 0.018          | -0.993                     | 0.075          |
| QZP           | 0.516        | 0.655          | -0.977                     | 0.135          |
| DJ            | 0.533        | 0.642          | -0.636                     | 0.561          |

Note: “\*” means correlation is significant ( $p < 0.05$ );

**Table S2.** Investigation of sampling sites in mangrove wetlands in Norther Beibu Gulf, South China Sea.

| Collecting station                            | abbreviation | longitude/° | latitude/° |
|-----------------------------------------------|--------------|-------------|------------|
| Dangjiang Mangrove Area - Low tide zone       | DJ-L         | 109.1048    | 21.5728    |
| DangjiangMangrove Area - Middle tide zone     | DJ-M         | 109.1068    | 21.5765    |
| Dangjiang Mangrove Are a- High tide zone      | DJ-H         | 109.1091    | 21.5820    |
| Maowei Sea Mangrove Area - Low tide zone      | MWS-L        | 108.5741    | 21.8620    |
| Maowei Sea Mangrove Area - Middle tide zone   | MWS-M        | 108.5756    | 21.8636    |
| Maowei Sea Mangrove Area - High tide zone     | MWS-H        | 108.5773    | 21.8656    |
| Qinzhou Port Mangrove Area - Low tide zone    | QZP-L        | 108.5931    | 21.7483    |
| Qinzhou Port Mangrove Area - Middle tide zone | QZP-M        | 108.5923    | 21.7480    |
| Qinzhou Port Mangrove Area - High tide zone   | QZP-H        | 108.5915    | 21.7479    |

**Table S3.** The LC-MS/MS parameters, blank contamination, LOQs and recoveries of OP triesters and their degradation products.

| No.                              | Compound | Retention<br>time/min | Quantification transition<br>(m/z) | Blank contamination<br>(ng/g) | LOQ<br>(ng/g) | Spiked recovery/%, (RSD) |
|----------------------------------|----------|-----------------------|------------------------------------|-------------------------------|---------------|--------------------------|
| <b>Organophosphate triesters</b> |          |                       |                                    |                               |               |                          |
| 1                                | TEP      | 5.76                  | 183>99<br>183>81                   | 0.10                          | 0.10          | 137 (2.36)               |
| 2                                | TCEP     | 6.54                  | 285>63<br>285>161                  | 0.66                          | 0.70          | 81 (15.57)               |
| 3                                | TCIPP    | 10.01                 | 327>175<br>327>99                  | 0.82                          | 0.95          | 68 (3.40)                |
| 4                                | TPRP     | 10.10                 | 225>99<br>225>81                   | n.d.                          | 1.16          | 110 (3.07)               |
| 5                                | TDCIPP   | 12.51                 | 431>99<br>431>208                  | n.d.                          | 0.032         | 71 (2.07)                |
| 6                                | TPHP     | 12.64                 | 327>77<br>327>152                  | n.d.                          | 0.0090        | 130 (2.81)               |
| 7                                | TIBP     | 14.14                 | 267>99<br>267>155                  | 0.81                          | 0.82          | 134 (1.10)               |
| 8                                | TNBP     | 14.38                 | 267>99<br>267>155                  | 0.28                          | 0.37          | 119 (10.17)              |
| 9                                | TBOEP    | 15.27                 | 399>199<br>399>299                 | n.d.                          | 0.018         | 125 (2.33)               |
| 10                               | TMPP     | 16.56                 | 369>165<br>369>91                  | n.d.                          | 0.021         | 106 (2.12)               |
| 11                               | EHDPP    | 17.56                 | 363>251<br>363>77                  | n.d.                          | 0.52          | 102 (6.39)               |
| 12                               | TEHP     | 21.76                 | 435>99                             | n.d.                          | 0.33          | 76 (7.48)                |

| No.                                                      | Compound   | Retention<br>time/min | Quantification transition<br>(m/z) | Blank contamination<br>(ng/g) | LOQ<br>(ng/g) | Spiked recovery/%, (RSD) |
|----------------------------------------------------------|------------|-----------------------|------------------------------------|-------------------------------|---------------|--------------------------|
|                                                          |            |                       | 435>113                            |                               |               |                          |
| <b>Organophosphate hydroxylated degradation products</b> |            |                       |                                    |                               |               |                          |
| 13                                                       | BBOEHEP    | 9.73                  | 343>243<br>343>45                  | 0.20                          | 0.35          | 99 (6.03)                |
| 14                                                       | 3-OH-TBOEP | 11.14                 | 415>101<br>415>57                  | n.d.                          | 0.07          | 86 (4.46)                |
| <b>Organophosphate diesters</b>                          |            |                       |                                    |                               |               |                          |
| 15                                                       | BCIPP      | 6.50                  | 249>35<br>251>37                   | n.d.                          | 5.00          | 104 (11.82)              |
| 16                                                       | DPHP       | 6.81                  | 249>93<br>249>155                  | 0.37                          | 0.39          | 85 (6.39)                |
| 17                                                       | DNBP       | 8.18                  | 209>153<br>209>137                 | 1.34                          | 1.96          | 80 (7.96)                |
| 18                                                       | BDCIPP     | 8.39                  | 319>35<br>317>35                   | n.d.                          | 0.50          | 84 (4.75)                |
| 19                                                       | BBOEP      | 9.22                  | 297>79<br>297>197                  | 0.21                          | 0.24          | 104 (10.05)              |

**Table S4.** Predicted no effect concentrations (PNEC) of OPEs based on EC50 or LC50.

| Compound | Organism                                         | Exposure duration | L(E)C <sub>50</sub> (mg/L) | logK <sub>oc</sub> | PNEC <sub>aqua</sub> (µg/L) | PNEC <sub>sed</sub> (ng/g) | Ref. |
|----------|--------------------------------------------------|-------------------|----------------------------|--------------------|-----------------------------|----------------------------|------|
| TCEP     | Algae ( <i>Scenedesmus subspicatus</i> )         | 96h               | 1.2                        | 2.48               | 1.2                         | 36.24                      | [1]  |
|          | Crustacea ( <i>Daphnia magna</i> )               | 24h               | 235                        | 2.48               | 235                         | 7096.89                    |      |
|          | Pisces ( <i>Carassius auratus</i> )              | 96h               | 90                         | 2.48               | 90                          | 2717.96                    |      |
| TDCIPP   | Algae ( <i>Pseudokirchneriella subcapitata</i> ) | 96h               | 12                         | 2.35               | 12                          | 268.65                     | [1]  |
|          | Crustacea ( <i>Daphnia magna</i> )               | 48h               | 3.8                        | 2.35               | 3.8                         | 85.07                      |      |
|          | Pisces ( <i>Carassius auratus</i> )              | 96h               | 5.1                        | 2.35               | 5.1                         | 114.17                     |      |
| TCIPP    | Algae ( <i>Pseudokirchneriella subcapitata</i> ) | 96h               | 47                         | 2.71               | 47                          | 2410.45                    | [1]  |
|          | Crustacea ( <i>Daphnia magna</i> )               | 48h               | 63                         | 2.71               | 63                          | 3231.03                    |      |
|          | Pisces ( <i>Brachydanio rerio</i> )              | 96h               | 56                         | 2.71               | 56                          | 2872.02                    |      |
| TPHP     | Algae ( <i>Pseudokirchneriella subcapitata</i> ) | 96h               | 2                          | 3.72               | 2                           | 1049.61                    | [1]  |
|          | Crustacea ( <i>Mysidopsis bahia</i> )            | 96h               | 0.25                       | 3.72               | 0.25                        | 131.20                     |      |
|          | Pisces ( <i>Cyprinodon variegatus</i> )          | 96h               | 0.44                       | 3.72               | 0.44                        | 230.92                     |      |
| TNBP     | Algae ( <i>Pseudokirchneriella subcapitata</i> ) | 96h               | 4.4                        | 3.28               | 4.4                         | 838.40                     | [1]  |
|          | Crustacea ( <i>Daphnia magna</i> )               | 24h               | 35                         | 3.28               | 35                          | 6669.11                    |      |
|          | Pisces ( <i>Brachydanio rerio</i> )              | 96h               | 11.4                       | 3.28               | 11.4                        | 2172.23                    |      |
| TIBP     | Algae ( <i>Scenedesmus subspicatus</i> )         | 96h               | 30                         | 3.6                | 30                          | 11943.22                   | [1]  |
|          | Crustacea ( <i>Daphnia magna</i> )               | 48h               | 11                         | 3.6                | 11                          | 4379.18                    |      |
|          | Pisces ( <i>Oncorhynchus mykiss</i> )            | 96h               | 23                         | 3.6                | 23                          | 9156.46                    |      |
| TBOEP    | Algae ( <i>Scenedesmus quadricauda</i> )         | 96h               | 0.3                        | 3.65               | 0.3                         | 134.01                     | [2]  |
|          | Crustacea ( <i>Daphnia magna</i> )               | 48h               | 75                         | 3.65               | 75                          | 33501.27                   |      |
|          | Pisces ( <i>Pimephales promelas</i> )            | 96h               | 11.2                       | 3.65               | 11.2                        | 5002.86                    |      |
| TEHP     | Algae ( <i>Scenedesmus subspicatus</i> )         | 72h               | 34                         | 6.87               | 34                          | 25204548.20                | [1]  |
|          | Pisces ( <i>Oryzias latipes</i> )                | 48h               | 500                        | 6.87               | 500                         | 370655120.65               |      |
|          | Crustacea ( <i>Daphnia magna</i> )               | 48h               | 11                         | 6.87               | 11                          | 8154412.65                 |      |
| EHDPP    | Crustacea                                        | /                 | /                          | 6.87               | 0.015                       | 29.19                      | [3]  |
| TEP      | Algae ( <i>Scenedesmus subspicatus</i> )         | 72h               | 900.8                      | 1.68               | 900.8                       | 4311.50                    | [1]  |
|          | Crustacea ( <i>Nitroca spinipes</i> )            | 96h               | 950                        | 1.68               | 950                         | 4546.99                    |      |

|            |                                          |     |        |      |        |          |     |
|------------|------------------------------------------|-----|--------|------|--------|----------|-----|
|            | Pisces ( <i>Alburnus alburnus</i> )      | 96h | 2350   | 1.68 | 2350   | 11247.81 |     |
| TMPP       | Algae ( <i>Ankistrodesmus falcatus</i> ) | 96h | 1.5    | 4.35 | 1.5    | 3358.08  | [2] |
|            | Crustacea ( <i>Daphnia magna</i> )       | 48h | 0.27   | 4.35 | 0.27   | 604.45   |     |
| TPrP       | Pisces (Zebrafish)                       | 96h | 252    | 2.83 | 252    | 17037.29 | [4] |
| 3-OH-TBOEP | /                                        | /   | /      | /    | /      | /        | /   |
| BBOEHEP    | /                                        | /   | /      | /    | /      | /        | /   |
|            | Daphnid                                  | 48h | 225.77 | 0.00 | 225.77 | 22.58    | a   |
| BCIPP      | Green Algae                              | 96h | 148.14 | 0.00 | 148.14 | 14.81    | a   |
|            | Fish(SW)                                 | 96h | 515.15 | 0.00 | 515.15 | 51.51    | a   |
|            | Daphnid                                  | 48h | 20.63  | 2.08 | 20.63  | 4.29     | a   |
| DPHP       | Green Algae                              | 96h | 21.48  | 2.08 | 21.48  | 4.47     | a   |
|            | Fish(SW)                                 | 96h | 42.41  | 2.08 | 42.41  | 8.82     | a   |
|            | Daphnid                                  | 48h | 55.41  | 2.18 | 55.41  | 12.08    | a   |
| DNBP       | Green Algae                              | 96h | 46.09  | 2.18 | 46.09  | 10.05    | a   |
|            | Fish(SW)                                 | 96h | 119.83 | 2.18 | 119.83 | 26.12    | a   |
|            | Daphnid                                  | 48h | 105.47 | 2.64 | 105.47 | 27.84    | a   |
| BDCIPP     | Green Algae                              | 96h | 84.01  | 2.64 | 84.01  | 22.18    | a   |
|            | Fish(SW)                                 | 96h | 230.32 | 2.64 | 230.32 | 60.80    | a   |
|            | Daphnid                                  | 48h | 419.47 | 3.78 | 419.47 | 158.56   | a   |
| BBOEP      | Green Algae                              | 96h | 156.85 | 3.78 | 156.85 | 59.29    | a   |
|            | Fish(SW)                                 | 96h | 527.26 | 3.78 | 527.26 | 199.30   | a   |

<sup>a</sup> Estimated by Estimation Program Interface (EPI) Suite, V 4.1; U.S. EPA 13.

"/" means related data can not be obtained.



## References

1. Verbruggen, E.M.J., Rila, J.P., Traas, T.P., Posthuma-Doodeman, C.J.A.M., Posthumus, R. Environmental Risk Limits for several phosphate esters, with possible application as flame retardant. RIVM report. 2005.
2. Liu, Y., Gong, S., Ye, L., Li, J., Liu, C., Chen, D., Fang, M., Letcher, R.J., Su, G. Organophosphate (OP) diesters and a review of sources, chemical properties, environmental occurrence, adverse effects, and future directions. *Environ. Int.* 2021 155, 106691.
3. Chen, M.; Gan, Z.; Qu, B.; Chen, S.; Dai, Y.; Bao, X. Temporal and seasonal variation and ecological risk evaluation of flame retardants in seawater and sediments from Bohai Bay near Tianjin, China during 2014 to 2017. *Mar. Pollut. Bull.* 2019, 146, 874 – 883.
4. Wang, X., Zhu, Q., Yan, X., Wang, Y., Liao, C., Jiang, G. A review of organophosphate flame retardants and plasticizers in the environment: Analysis, occurrence and risk assessment. *Sci. Total Environ.* 2020. 731, 139071.
